# Supplementary material for: Direct-write printing of reactive oligomeric alkoxysilanes as an affordable and highly efficient route for promoting local adhesion of silver inks on polymer substrates
Source: Royal Society of Chemistry journal article supplement (doi:10.1039/c5tc03497c), 2016-01-01
Supplement: c5tc03497c1.pdf [file c5tc03497c1.pdf]

## Supporting Information to the manuscript

### Direct-Write Printing of Reactive Oligomeric Alkoxysilanes as an Affordable and Highly Efficient Route Towards Local of Silver Inks of Flexible Polymer Substrates

M. N. Kirikova, E. V. Agina, A. A. Bessonov, A. S. Sizov, O. V. Borshchev, A. A. Trul, A. M. Muzafarov, and Sergei A. Ponomarenko

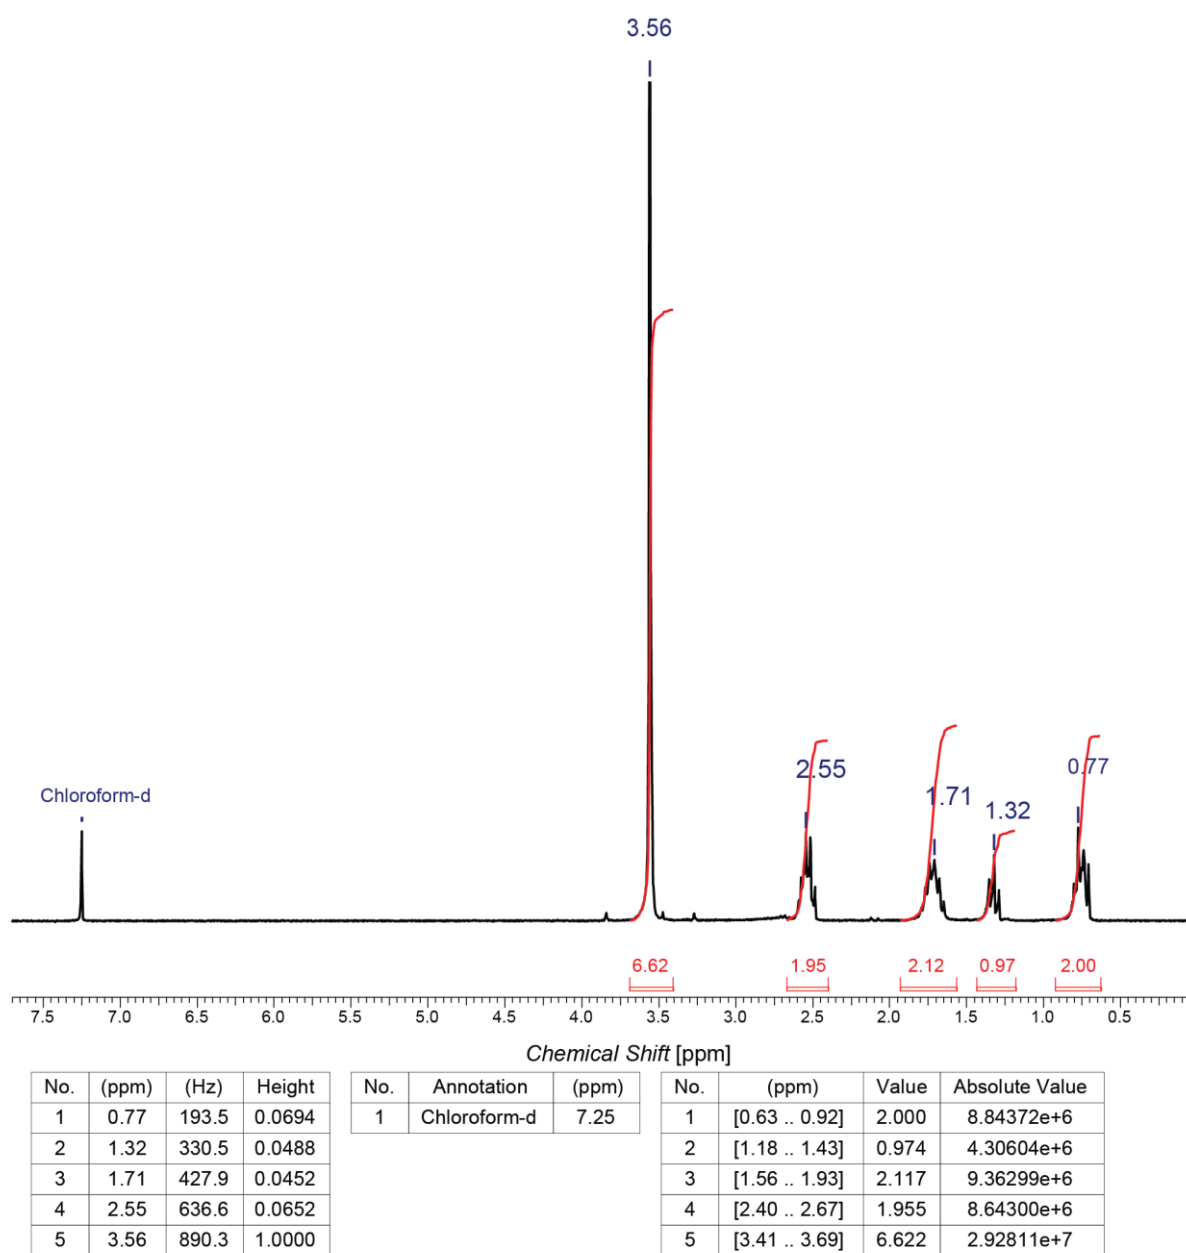

**Figure S1.**  $^1\text{H}$  NMR spectrum of OMPMS ( $M_n \sim 500$ ) ( $\text{CDCl}_3$ , 24 °C, 250 MHz).

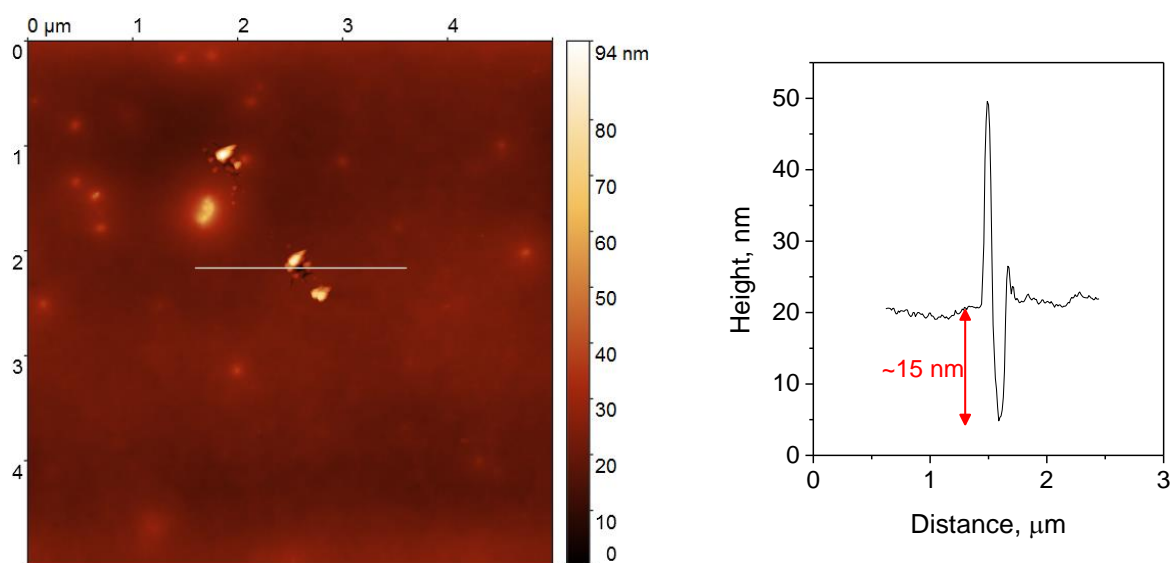

**Figure S2.** AFM morphology (a) and profile (b) of SAL-functionalized PEN deposited by spin-coating of 6% oligomeric MPTS in MeOH. The SAL thickness was estimated to be at least 15 nm from AFM profiling.

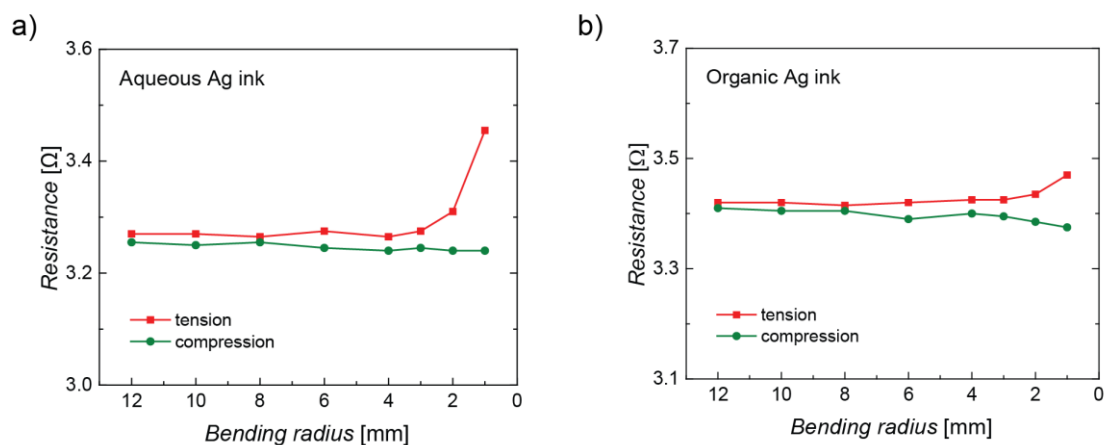

**Figure S3.** Resistance change of printed silver structures on SAL-functionalized PEN with bending up to a radius of 10 mm (strain ~0.6–0.7 %).
